1 **Aerobic removal of microcystin-LR by a novel native effective bacterial**  
2 **community designated as YFMCD4 isolated from Lake Taihu**

3 **Fei Yang<sup>a\*</sup>, Jian Guo<sup>a</sup>, Feiyu Huang<sup>a</sup>, Isaac Yaw Massey<sup>a</sup>, Ruixue Huang<sup>a\*</sup>, Ping Ding<sup>a</sup>,**  
4 **Weiming Zeng<sup>b</sup>**

5 <sup>a</sup>Department of Occupational and Environmental Health, Xiangya School of Public Health,  
6 Central South University, Changsha, China

7 <sup>b</sup>Key Laboratory of Biometallurgy, Ministry of Education, School of Minerals Processing and  
8 Bioengineering, Central South University, Changsha, China

9 Corresponding author 1: FY e-mail: [phfyang@csu.edu.cn](mailto:phfyang@csu.edu.cn)

10 Corresponding author 2: RH e-mail: [yangfeilong@126.com](mailto:yangfeilong@126.com)

11 **Abstract**

12 Microcystins (MCs) are a group of monocyclic heptapeptide hepatotoxins produced by species of  
13 cyanobacteria. MC-LR is the most toxic and frequently detected MCs variant in water, which  
14 poses a great threat to the natural ecosystem and public health. It's important to seek  
15 environment-friendly and cost-efficient methods to remove MC-LR. To investigate the MC-  
16 degrading capacities of a novel indigenous bacterial community designated as YFMCD4 and the  
17 influence of environmental factors including various temperatures, MC concentrations and pH on  
18 the MC-degrading activities, the concentration of MC-LR was measured by high performance  
19 liquid chromatography. In addition, the MC-degrading mechanism containing the degradation  
20 pathway and products of YFMCD4 was studied using HPLC coupled with an ultra-high  
21 resolution LTQ Orbitrap Velos Pro ETD mass spectrometry equipped with electrospray  
22 ionization interface. The data showed MC-LR can be removed at the maximum rate of 0.5  
23  $\mu\text{g}/(\text{ml}\cdot\text{h})$  by YFMCD4 containing *Alcaligenes faecalis* and *Stenotrophomonas acidaminihila*.

24 The MC-degrading rates of YFMCD4 were significantly affected by different temperatures, pH  
25 and MC-LR concentrations. Two intermediates of a tetrapeptide and Adda appeared in the  
26 degradation process. These results illustrate that the novel bacterial community YFMCD4 can  
27 remove MC-LR effectively and completely, which indicates YFMCD4 possesses a significant  
28 potential to be used in bioremediation of water bodies contaminated by MC-LR.

## 29 **Introduction**

30 Cyanobacterial harmful algal blooms (CyanoHABs) have proliferated worldwide because of  
31 eutrophication and climate change [1-4]. Microcystins (MCs) produced by *Microcystis*,  
32 *Anabaena*, *Oscillatoria* and *Nostoc* during CyanoHABs threatens the public health and have  
33 become a serious global problem due to their extreme toxicities, which have attracted global  
34 attention [3, 5]. MCs are a group of monocyclic heptapeptide hepatotoxins with the common  
35 genetic structure cyclo-(D-Ala-X-D-MeAsp-Z-Adda-D-Glu-Mdha-), where X and Z represent  
36 variable L-amino acids, and Adda is the  $\beta$ -amino acid residue of 3-amino-9-methoxy-2,6,8-  
37 trimethyl-10-phenyldeca-4,6-dienoic acid. Until now, over 100 analogs of MCs have been  
38 identified and MC-LR is the most toxic and abundant MC variant [6, 7]. MC-LR is harmful to  
39 different organs including liver, intestine, colon, brain, kidney, lung, heart and reproductive  
40 system because it can inhibit the activities of protein phosphatases and affect the regulation of  
41 miRNA expression in these systems [8, 9]. Even the chronic exposure to low concentrations of  
42 MCs also can promote tumor growth. The International Agency for Research on Cancer (IARC)  
43 has classified MC-LR as a possible carcinogen because of its potential carcinogenic activity [10].  
44 To reduce MC-LR risks, the World Health Organization (WHO) has proposed a provisional  
45 guideline of 1  $\mu\text{g/L}$  MCs in drinking water and this guideline level has been adopted in  
46 legislation in many countries such as South America, Australasia, Europe and China [11].

47 MC-LR is very stable and resistant to many natural factors including extreme pH, high  
48 temperature and sunlight in the environment owing to the cyclic structure [3, 6, 12]. Moreover,  
49 MC-LR can be accumulated in aquatic organisms and food crops representing a health hazard to  
50 human and animals through food chains [13]. It is very important to reduce MC-LR  
51 concentration in freshwater ecosystem. However, conventional drinking water treatments have  
52 limited efficacy in removing MC-LR. Some physical and chemical methods containing  
53 ozonation, chlorination, photocatalysis and electrolysis have been proposed for MC-LR  
54 elimination from drinking water. However, all these methods have certain limitations in terms of  
55 high operating costs, low efficacy and harmful by-products [3, 6, 14, 15]. It's desirable that  
56 investigators seek other environmentally-benign and cost-efficient methods and technologies to  
57 remove MC-LR found in water bodies [3, 6, 14-17].

58 Several previous investigations demonstrated that microbial biodegradation may be one of  
59 the most environmentally-friendly, effective and promising treatment methods for removing  
60 MC-LR in natural waters, since it can detoxify MC-LR and don't generated any apparent  
61 potential harmful by-products [3, 6, 14-17]. A few MC-degrading pure bacterial strains have  
62 been isolated, identified and had their mechanisms reported, and most of the isolated MC-  
63 degrading bacteria were limited to the family *Sphingomonadaceae* [16-18]. In practice, native  
64 bacterial communities (indigenous bacterial mixed culture) may be more suitable for degrading  
65 MC-LR in the environment compared to the single pure bacterial strains [6,19]. Therefore, it's  
66 very interesting and important to obtain some native mixed bacterial communities for MC-LR  
67 removal.

68 Lake Taihu is the third largest lake with a total water surface area of about 2,338 km<sup>2</sup> in  
69 China. Lake Taihu is essential to millions of people for drinking water, aquaculture, industrial

70 activities, and recreation, but it has experienced CyanoHABs every year during the last three  
71 decades [3, 6, 15, 18]. The MCs and odorous during CyanoHABs resulted in more than 2 million  
72 residents in Wuxi City being without drinking water for a week. Thus, it's desirable to obtain  
73 bacterial stains and remove MC-LR in water. In this study, the MC-LR removal capacities of a  
74 novel native bacterial community designated as YFMCD4 from Lake Taihu were determined  
75 under various environmental factors containing different temperatures and pH as well as MC-LR  
76 concentrations. Moreover, the MC-removal mechanism including degradation pathway and  
77 products of YFMCD4 was investigated.

78

## 79 **Materials and Methods**

### 80 **Materials and Reagents**

81 MC-LR was purchased from Alexis Corporation and stored -20°C (purity≥95 %). Formic  
82 acid and methanol used for high performance liquid chromatography (HPLC) and ultra-high  
83 resolution LTQ Orbitrap Velos Pro ETD mass spectrometry equipped with electrospray  
84 ionization interface (HPLC-ESI-MS) analysis were purchased from Dikma Technology  
85 Incorporation in USA. The mineral salt medium (MSM) for bacterial culture, acquisition and  
86 MC-LR removal was prepared as previous study [3, 6, 15]

87

88 Acquisition of a novel native bacterial community YFMCD4, isolation and identification of  
89 bacterial strains in the bacterial mixed culture

90 5 g of wet sludge sample was collected from Lake Taihu and suspended in 45 ml MSM. A  
91 novel MC-degrading bacterial community was obtained and designated as YFMCD4 in 24 days  
92 under the conditions previously described by Yang et al. [6]. The bacterial community YFMCD4

93 serially diluted with sterile MSM and 0.1 ml of each dilution were inoculated onto nutrient agar  
94 (2% agar) plates. Two pure bacterial strains named YFMCD4-1 and YFMCD4-2 were isolated.

95 16S rRNA gene fragments of YFMCD4-1 and YFMCD4-2 were amplified using PCR with  
96 the universal primers 5'-AGAGTTTGATCMTGGCTCAG-3' and 5'-  
97 TACGGYTACCTTGTTACGAACTT-3') under the conditions previously described by [4]. The  
98 PCR products were sequenced by the Sangon Biotech Incorporation located in Shanghai, China.  
99 Nucleotide sequences comparisons were conducted using the National Center for Biotechnology  
100 Information (NCBI) database (<http://www.ncbi.nlm.nih.gov/BLAST>). The program ClustalW 2.1  
101 was applied to align the entire similar 16S rRNA gene sequences downloaded from the NCBI  
102 database. Phylogenetic trees were successfully generated via the neighbor-joining method using  
103 the MEGA software Tamura et al. [20].

104

105 MC-LR degradation by bacterial community YFMCD4

106 To study MC-LR-degrading ability of YFMCD4, the bacterial community YFMCD4 was  
107 cultured with MC-LR under different incubation conditions including different temperatures at  
108 20°C, 30°C or 40°C, at MC-LR concentrations 1, 2, 3, 4 or 5 µg/ml, and at pH 3, 5, 7, 9 or 11.  
109 100µl samples were withdrawn at intervals and centrifuged (12,000×g, 15 min, 4°C) for  
110 monitoring the concentrations of MC-LR in all the samples using HPLC. All the experiments  
111 were duplicated with bacterial free samples serving as the control.

112 Analysis of MC-LR and its degrading products

113 The Agilent 1100 HPLC machine with a Zorbax Extend C<sub>18</sub> column (4.6 × 150 mm, 5 µm,  
114 Agilent, USA) and a variable wavelength detector (VWD) set at 238 nm was employed for  
115 analyzing MC-LR and degradation products. The mobile phase was a mixture of 0.1 %

116 trifluoroacetic acid aqueous solution and methanol (37:63, v/v) set at a flow rate of 0.8 ml/min,  
117 injection volume 10µl and column temperature 40°C.

118 The MC-degrading products were identified by HPLCcoupled with an ultra-high resolution  
119 LTQ Orbitrap Velos Pro ETD mass spectrometry (Thermo Scientific, Germany) equipped with  
120 electrospray ionization interface (HPLC-ESI-MS). Both the auxiliary and sheath gases were  
121 nitrogen at a flow rate of 30 and 5 psi, respectively. The dry gas temperature was set at 350 °C,  
122 and nebulizer pressure at 45 psi. Spectra were recorded in positive modes at a spray voltage of  
123 3.5 kV.

124

## 125 **Results**

126 Acquisition of bacterial community and identification of bacterial strains

127 A novel MC-degrading bacterial community named YFMCD4 was obtained. Two bacterial  
128 strains designated YFMCD4-1 and YFMCD4-2 were isolated from the bacterial community  
129 YFMCD4 and identified according to 16S rRNA gene sequences. YFMCD4-1 and YFMCD4-2  
130 was classified as *Alcaligenes faecalis* and *Stenotrophomonas acidaminihila* respectively  
131 (Figure 1). The nucleotide sequences of 16S rRNA genes from YFMCD4-1 and YFMCD4-2  
132 were deposited in the NCBI database with accession number MH106702 and MH106704  
133 respectively

134

135

136

137

138

139

140

141

142

143

144

145

146

147

148

149

150

151

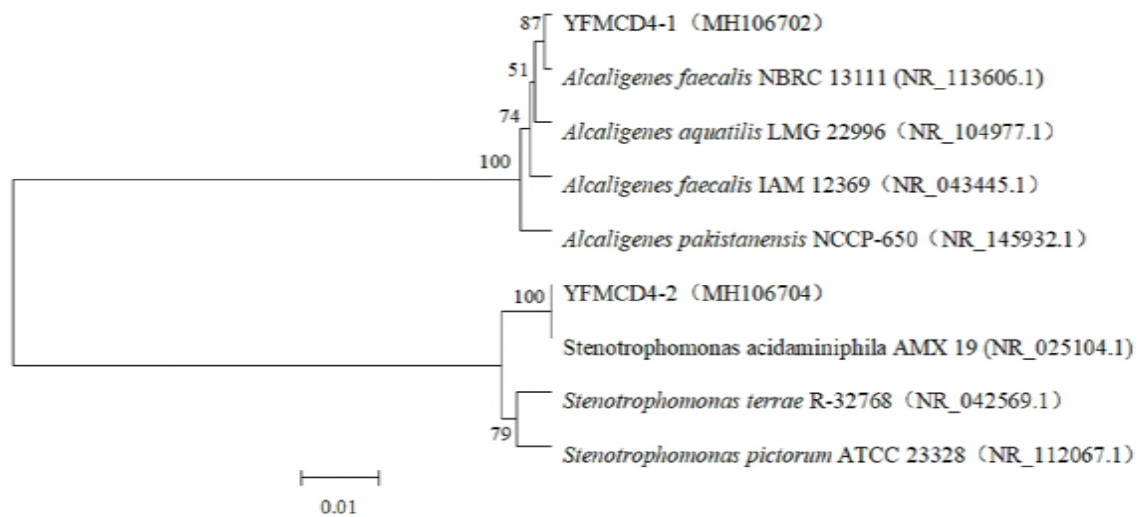

152 **Figure 1. Construction of phylogenetic tree based on the bacterial 16S rRNA gene sequence of the**  
153 **YFMCD4-1 and YFMCD4-2 using neighbor joining method.**

154

#### 155 MC-degrading activities under different conditions

156 Single factor experiments were performed and results are showed in Figures 2-4. The MC-  
157 LR degrading rates of the bacterial community YFMCD4 were influenced by different  
158 incubation temperatures (Figure 2), MC-LR concentrations (Figure 3) and pH (Figure 4). Figure  
159 2 showed that YFMCD4 degraded MC-LR at the average rate of 0.09, 0.33, 0.25 $\mu\text{g}/(\text{ml}\cdot\text{h})$  at 20,  
160 30, and 40°C respectively in 10 h.

161 Figure 3 illustrated that pH 7 and 30°C MC-LR at concentrations of 1, 2, 3, 4 or 5  $\mu\text{g}/\text{ml}$   
162 were degraded at the average rate of 0.25, 0.33, 0.375, 0.5 and 0.5  $\mu\text{g}/(\text{ml}\cdot\text{h})$  in 10 h, respectively.  
163 Figure 4 demonstrated that at 30°C 2  $\mu\text{g}/\text{ml}$  MC-LR was degraded by YFMCD4 at the rate of  
164 0.12, 0.25, 0.33, 0.25 and 0.17  $\mu\text{g}/(\text{ml}\cdot\text{h})$  at pH 3, 5, 7, 9 and 11 in 10 h, respectively. Results  
165 indicated that the highest MC-degrading rate for YFMCD4 was 0.5  $\mu\text{g}/(\text{ml}\cdot\text{h})$  at 30°C and pH 7

166 with MC-LR concentrations of 4 or 5  $\mu\text{g/ml}$ . It should be noted that there was no MC-LR  
167 degradation in the control media without bacterial community YFMCD4.

168

169

170

171

172

173

174

175

176

177

178

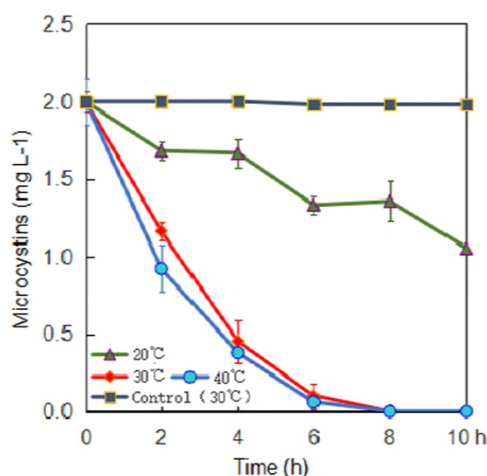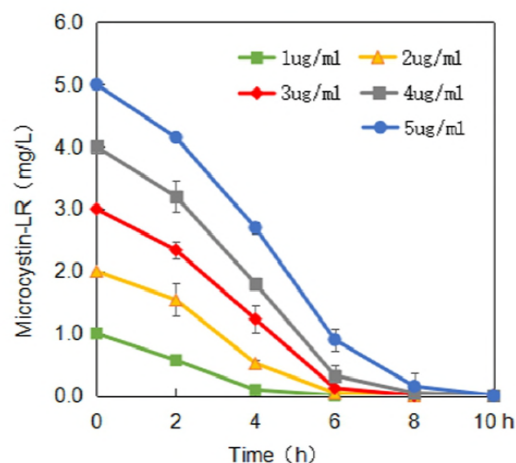

179 **Figure 2. Effect of incubation temperature on**  
180 **the degradation rate of MC-LR by YFMCD4**

179 **Figure 3. Effect of MC-LR concentration on the**  
180 **degradation of MC-LR by YFMCD4**

181

182

183

184

185

186

187

188

189

190

191

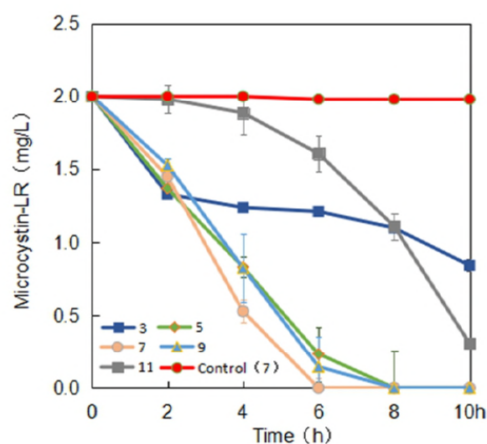

192 **Figure 4. Effect of pH on the degradation of MC-LR by bacterial community YFMCD4**

193

194 MC-LR analysis and degradation products

195 HPLC chromatograms of MC-LR and its degradation products are showed in Figure 5.

196 Degradation of MC-LR by bacterial community YFMCD4 was tested in culture under the



197 optimal conditions of 30°C, pH 7, with 5 µg/ml of MC-LR concentration in the culture. HPLC  
198 chromatograms showed the retention time of MC-LR was 8.1 min (Figure 5a). The peak area of  
199 MC-LR decreased significantly after incubation, and two main intermediate degradation  
200 products of MC (peak A and B) were apparent at 4h (Figure 5b). The disappearance of all the  
201 peaks demonstrated complete catabolism of MC-LR and its degradation products by YFMCD4  
202 in 12 h (Figure 5c). The degradation products peak A and B were further identified using the  
203 HPLC-ESI-MS, and exhibited accompanying ion at m/z 615.33850 (Figure 6) and m/z  
204 332.33325 (Figure 7). The HPLC chromatograms and ion of peak A were identical to the  
205 tetrapeptide found by [21]. The ion of peak B was identical to Adda which was the final MC  
206 degradation product of the *Sphingopyxis* C-1 [22] and the immediate degradation products of  
207 *Bordetella* sp. MC-LTH1 [3]. The degradation products indicate that the degradation pathway of  
208 YFMCD4 probably may be similar with that of *Bordetella* sp. MC-LTH1 (Figure 8).

209

210

211

212

213

214

215

216

217

218

219

220  
221  
222  
223  
224  
225  
226  
227  
228  
229  
230  
231  
232  
233  
234  
235  
236  
237  
238  
239  
240  
241  
242  
243  
244  
245  
246  
247  
248  
249  
250  
251

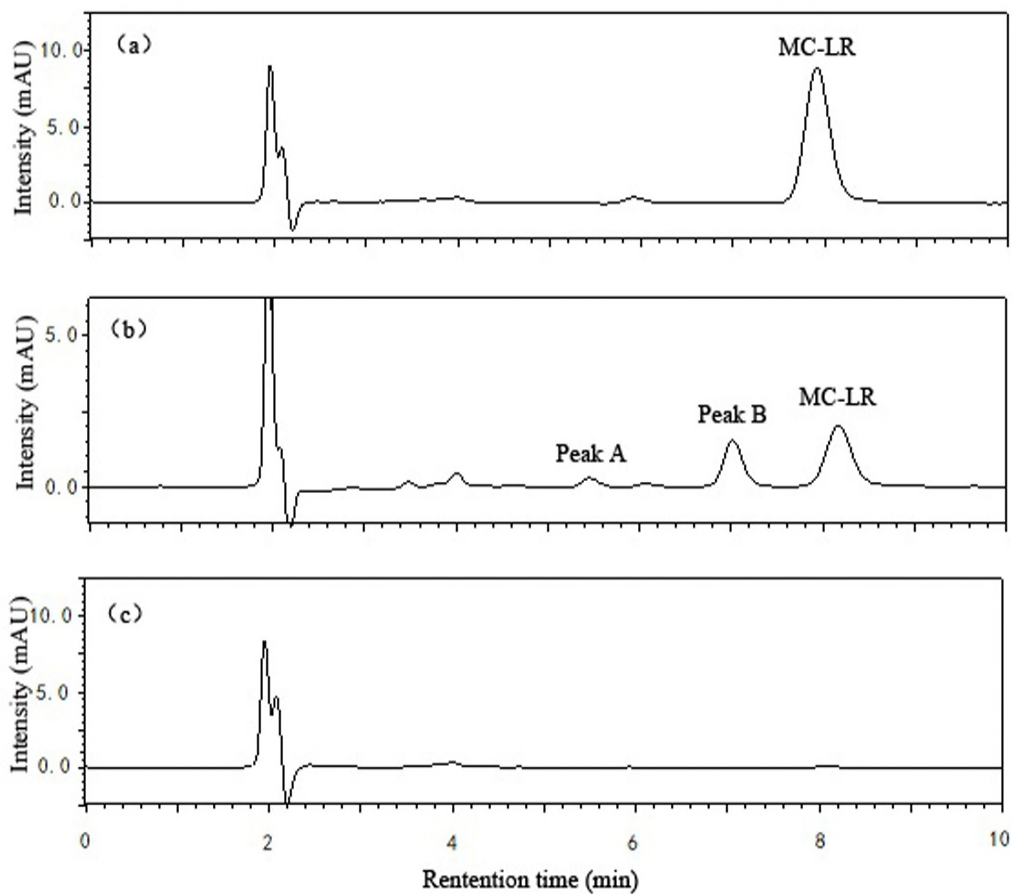

**Figure 5. HPLC chromatograms obtained during MC-LR degradation incubated with bacterial community YFMCD4 at time 0 h (a), 4 h (b) and 12 h (c).**

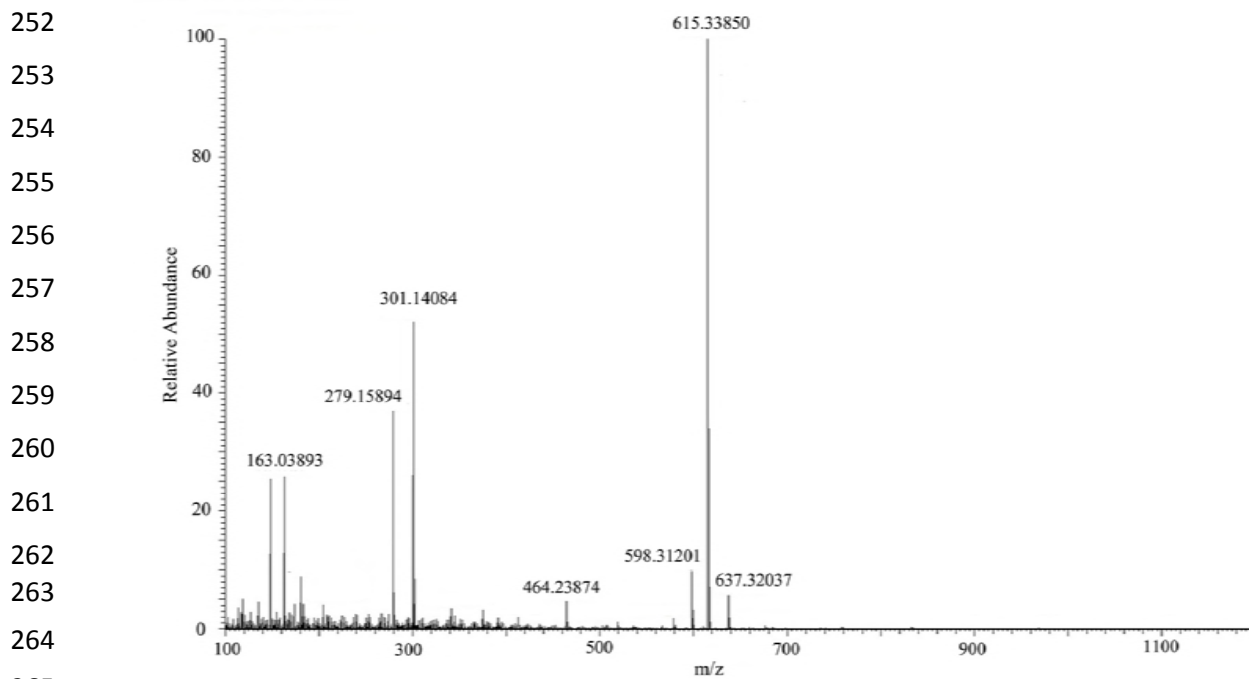

267 **Figure 6. HPLC-ESI-MS spectrum of the biodegradation product A of MC-LR**

268

269

270

271

272

273

274

275

276

277

278

279

280

281

282

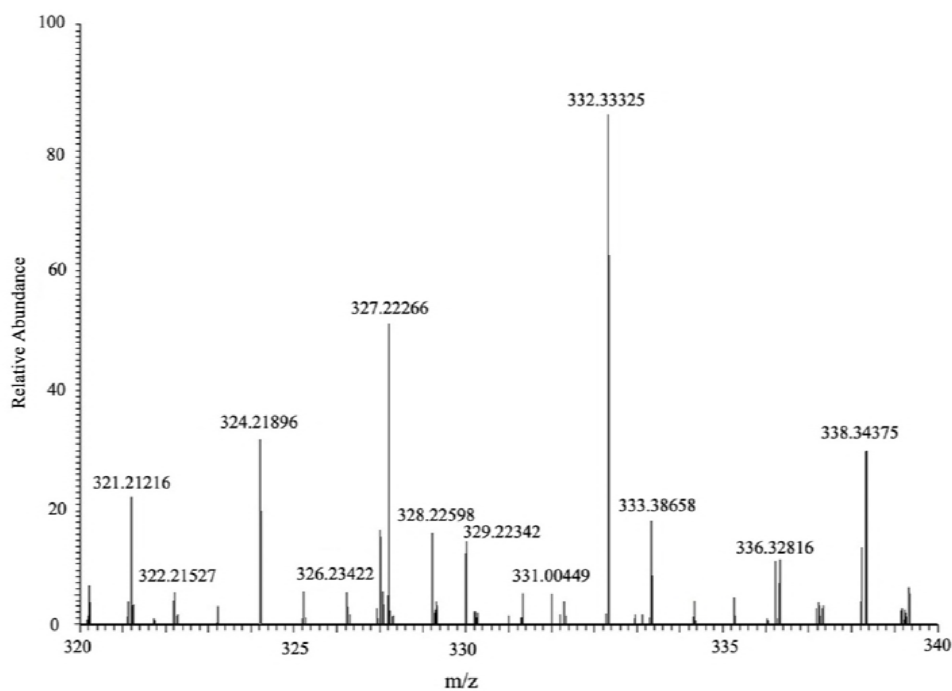

283 **Figure 7. HPLC-ESI-MS spectrum of the biodegradation product B of MC-LR**

284

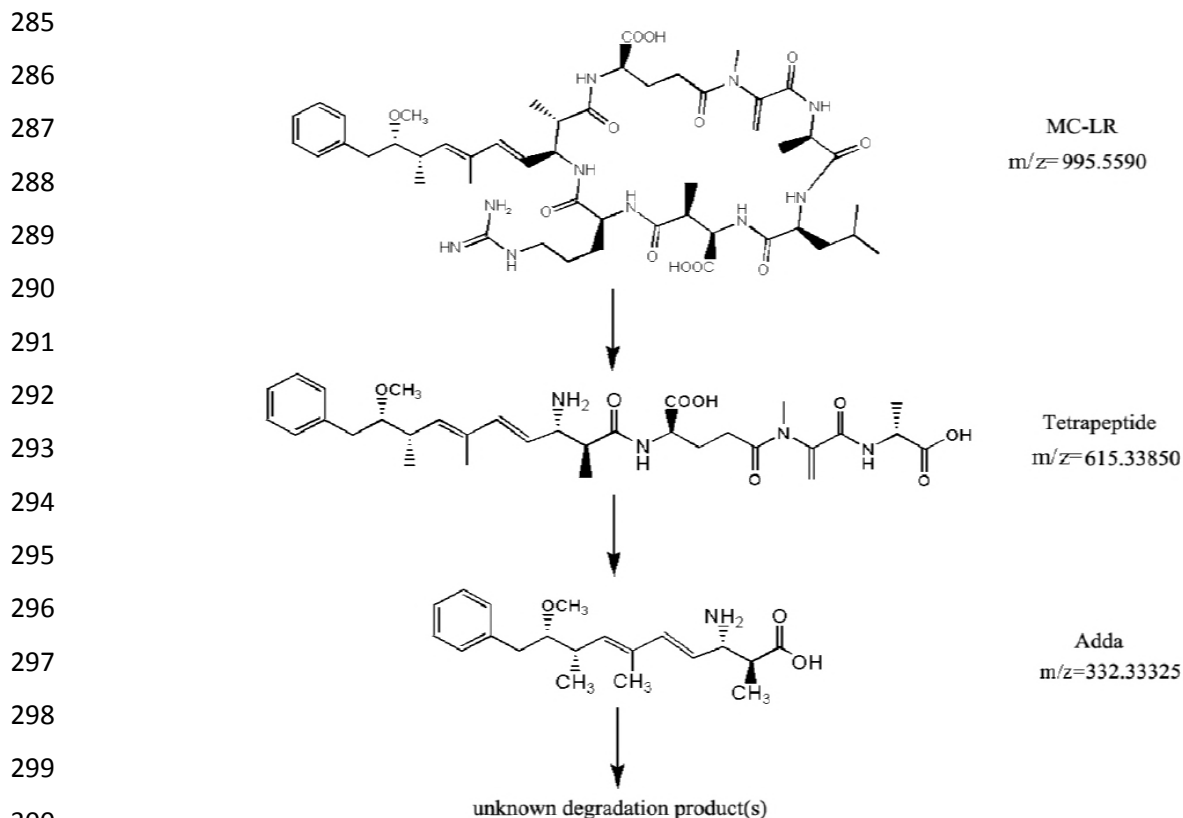

303 **Figure 8. Putative degradation pathway of MC-LR and the formation of intermediate products**  
304 **(tetrapeptide and Adda) by YFMCD4**

## 305 Discussion

306  
307 Microbial biodegradation is an environmentally-friendly and effective treatment method for  
308 detoxify MC-LR in natural waters without potential harmful by-products. Some MC-degrading  
309 pure bacterial strains have been isolated and have their MC-LR-degrading rates reported [6, 16,  
310 17, 19]. For example, the single pure bacterial strain *Sphingomonas* sp. ACM-3962  
311 (1.7 $\mu\text{g}/(\text{ml}\cdot\text{d})$ ) [23], LH21 (2.1 $\mu\text{g}/(\text{ml}\cdot\text{d})$ ) [24] and EMS (0.7 $\mu\text{g}/(\text{ml}\cdot\text{d})$ ) [25], *Ralstonia*  
312 *solanacearum* (9.4 $\mu\text{g}/(\text{ml}\cdot\text{d})$ ) [26], *Bordetella* sp. MC-LTH1 (7.4 $\mu\text{g}/(\text{ml}\cdot\text{d})$ ) [3] and  
313 *Stenotrophomonas* sp.MC-LTH2 (3  $\mu\text{g}/(\text{ml}\cdot\text{d})$ ) [15] were studied. Until now, only a few MC-

314 degrading bacteria mixed cultures have been obtained and investigated [16, 27]. Cousins et al.  
315 [27] reported that a bacterial community showed the MC-degrading rate of  $1.4 \times 10^{-3} \mu\text{g}/(\text{ml}\cdot\text{d})$   
316 while what kinds of bacteria existed in the community still needed to be further studied. Ramani  
317 et al. [16] found a bacterial community containing two pure bacterial strains *Rhizobium* sp. DC7  
318 and *Microbacterium* sp. DC8 degraded MC at  $0.18 \mu\text{g}/(\text{ml}\cdot\text{d})$  while individual DC7 or DC8 can't  
319 degrade MC-LR respectively. Tsao et al. [19] discovered a mixed culture with MC-degradation  
320 rate of  $0.876 \mu\text{g}/(\text{ml}\cdot\text{d})$ , which contained *Sphingomonas* sp., *Pseudoxanthomonas* sp.,  
321 *Hyphomicrobium aestuarii*, *Sphingobium* sp., *Rhizobium* sp., *Steroidobacter* sp. and  
322 *Acinetobacter* sp. Yang et al. [6] declared another natural bacterial community YFMCD1  
323 including *Klebsiella* sp. YFMCD1-1 or *Stenotrophomonas* sp. YFMCD1-2 with the MC-  
324 degrading rate of  $12 \mu\text{g}/(\text{ml}\cdot\text{d})$ . The bacterial community YFMCD4 showed a higher degradation  
325 rate of MC-LR at  $12 \mu\text{g}/(\text{ml}\cdot\text{d})$  compared with the single bacterial strain and most prior bacterial  
326 communities. These results confirmed that indigenous bacterial community always appeared to  
327 be more effective and suitable for degrading MC-LR than single pure bacterial strains, which  
328 was in accordance with the previous findings by Yang et al. [6], Ramani et al. [16] and Zhang et  
329 al. [26]. In general, different bacterial community owed different MC-degrading rates because  
330 they contained different pure bacterial species. However, it's interesting that the bacterial  
331 community YFMCD4 exhibited the same highest MC-degrading rate with YFMCD1, which  
332 means that different bacterial communities may have a similar MC-degrading rate although they  
333 consisted of different kinds of pure bacterial strains [3, 15].

334 The MC-degrading rates of bacterial community YFMCD4 were significantly affected by  
335 different temperatures, pH and MC-LR concentrations. The optimal conditions for degradation  
336 of MC-LR by YFMCD4 occurred at  $30^{\circ}\text{C}$ , pH 7 and MC-LR concentration of  $4 \mu\text{g}/\text{ml}$  or 5

337  $\mu\text{g/ml}$ . Prior studies and our previous studies showed that these three factors play an important  
338 role in MCs degradation [15, 28-30]. Park et al. [29] found the degradation rates were strongly  
339 dependent on temperature and the MC-degrading rate was very slow at 5°C while the maximum  
340 degradation rate occurred at 30°C. Ramani et al. [16] found temperature has some effects on  
341 MC-LR degradation and the optimal degradation rate was achieved at 26°C. Yang et al. [6] also  
342 discovered that the degradation rates changed when the temperature varied, and the best  
343 temperature for MC-LR degradation was 30°C. It was necessary to investigate the influence of  
344 pH on MC-LR degradation activities of bacteria because the pH of water bodies varies during  
345 cyanobacterial blooms [31]. The highest ability of YFMCD4 to degrade MC-LR under neutral  
346 environment suggested that YFMCD4 may contain MC-degrading enzymes which are different  
347 from alkali-tolerant protease secreted by *Sphigopyxis* sp. C-1 [31].

348 Two kinds of intermediates of MC-LR degradation were identified as the linearized MC-LR  
349 and a tetrapeptide in the previous studies [3, 15, 21, 32]. Moreover, the intact Adda was isolated  
350 and identified from the final MC-LR degradation products using *Sphingomonas* sp. B-9 [32]. In  
351 this study, two intermediates Adda and a tetrapeptide appeared when YFMCD4 degraded MC-  
352 LR, and the Adda disappeared finally. Therefore, the results showed that, the MC-degrading  
353 mechanism of the bacterial community YFMCD4 is different from that of the previous bacteria  
354 *Sphingomonas* sp. B-9 [32] and ACM-3962 [23] as well as *Sphigopyxis* sp. C-1 [31]. The MC-  
355 degrading mechanism of the bacterial community YFMCD4 is also possibly different from that  
356 of the bacterial community YFMCD1 because of no existence of tetrapeptide in the MC-  
357 degrading products using YFMCD1. As is known to us all, the Adda is absolutely essential for  
358 the biological activities of MC-LR [32]. In this study, the Adda was completely degraded, which  
359 suggested that the bacterial community YFMCD4 had the capacity of detoxifying MC-LR [3, 6,

360 15]. The degradation products of Adda needed to be further isolated and clarified, and it is  
361 important to investigate the practical MC-degrading effects of YFMCD4 when it is applied into  
362 different kinds of water polluted by MC-LR in the future.

### 363 **Conclusion**

364 A novel native effective MC-degrading bacterial community designated as YFMCD4 was  
365 obtained from Lake Taihu, and two pure bacterial strains *Alcaligenes faecalis* YFMCD4-1 and  
366 *Stenotrophomonas acidaminihila* YFMCD4-2 were isolated from the bacterial community  
367 YFMCD4. The degradation rate of MC-LR by bacterial community YFMCD4 was significantly  
368 influenced by various pH, temperature and MC-LR concentrations, and the highest rate reached  
369 0.5  $\mu\text{g}/(\text{ml}\cdot\text{h})$  at 30°C and pH 7 with MC-LR concentrations of 4 or 5  $\mu\text{g}/\text{ml}$ . Two intermediates  
370 of tetrapeptide and Adda existed in the MC-degrading products, and the Adda was completely  
371 degraded by the bacterial community YFMCD4. Therefore, the bacterial community YFMCD4  
372 can completely degrade MC-LR effectively and has a great potential for the bioremediation of  
373 water polluted by MC-LR.

### 374 **Acknowledgments**

375 We would like to thank Professor Shaogang Liu from Central South University for his help on  
376 MC degradation products measurements and Associate Professor Jihua Chen from Central South  
377 University for his advice on MC degradation.

### 378 **Reference**

- 379 1. Carmichael WW (1992) Cyanobacteria secondary metabolites--the cyanotoxins. *The Journal*  
380 *of applied bacteriology* 6: 445-459.
- 381 2. Dziga D, Wasylewski M, Wladyka B, Nybom S, Meriluoto J (2013) Microbial Degradation of  
382 Microcystins. *Chemical Research in Toxicology* 26 :841-852.

- 383 3. Yang F, Zhou Y, Sun R, Wei H, Li Y, Yin L, et al. (2014) Biodegradation of microcystin-LR  
384 and-RR by a novel microcystin-degrading bacterium isolated from Lake Taihu. *Biodegradation*.  
385 25 :447-457.
- 386 4. Yang F, Wei HY, Li XQ, Li YH, Li XB, Yin LH, et al. (2013) Isolation and characterization  
387 of an algicidal bacterium indigenous to lake Taihu with a red pigment able to lyse microcystis  
388 aeruginosa. *Biomedical and environmental sciences* 26: 148-154.
- 389 5. Ito E, Takai A, Kondo F, Masui H, Imanishi S, Harada K (2002) Comparison of protein  
390 phosphatase inhibitory activity and apparent toxicity of microcystins and related compounds.  
391 *Toxicon* 40: 1017-1025.
- 392 6. Yang F, Massey IY, Guo J, Yang S, Pu Y, Zeng W, et al. (2018) Microcystin-LR degradation  
393 utilizing a novel effective indigenous bacterial community YFMCD1 from Lake Taihu. *Journal*  
394 *of toxicology and environmental health Part A* 9:1-10.
- 395 7. Luukkainen R, Namikoshi M, Sivonen K, Rinehart KL, Niemela SI (1994) Isolation and  
396 identification of 12 microcystins from four strains and two bloom samples of *Microcystis* spp.:  
397 structure of a new hepatotoxin. *Toxicon* : official journal of the International Society on  
398 *Toxinology* 32: 133-139.
- 399 8. Wang Q, Xie P, Chen J, Liang G (2008) Distribution of microcystins in various organs (heart,  
400 liver, intestine, gonad, brain, kidney and lung) of Wistar rat via intravenous injection. *Toxicon*  
401 52: 721-727.
- 402 9 Yang S, Chen L, Wen C, Zhang X, Feng X, Yang F (2018) MicroRNA expression profiling  
403 involved in MC-LR-induced hepatotoxicity using high-throughput sequencing analysis. *Journal*  
404 *of toxicology and environmental health Part A*. 81: 89-97.



- 405 10. Fan H, Cai Y, Xie P, Xiao W, Chen J, Ji W, et al. (2014) Microcystin-LR stabilizes c-myc  
406 protein by inhibiting protein phosphatase 2A in HEK293 cells. *Toxicology* 7: 69-74.
- 407 11. WHO (1998). Cyanobacterial toxins: Microcystin-LR. Guidelines for drinking water quality.  
408 World Health Organization, Geneva.
- 409 12. Sivonen K (1990) Effects of light, temperature, nitrate, orthophosphate, and bacteria on  
410 growth of and hepatotoxin production by *Oscillatoria agardhii* strains. *Applied and*  
411 *environmental microbiology* 56: 2658-2666.
- 412 13. Qian ZY, Li ZG, Ma J, Gong TT, Xian QM (2017) Analysis of trace microcystins in  
413 vegetables using matrix solid-phase dispersion followed by high performance liquid  
414 chromatography triple quadrupole mass spectrometry detection. *Talanta* 173:101-106.
- 415 14. Svrcek C, Smith DW (2004) Cyanobacteria toxins and the current state of knowledge on  
416 water treatment options: a review. *Journal of Environmental Engineering and Science* 3: 155-  
417 185.
- 418 15. Yang F, Zhou Y, Yin L, Zhu G, Liang G, Pu Y (2014) Microcystin-degrading activity of an  
419 indigenous bacterial strain *Stenotrophomonas acidaminiphila* MC-LTH2 isolated from Lake  
420 Taihu. *PloS one* 9
- 421 16. Ramani A, Rein K, Shetty KG, Jayachandran K (2012) Microbial degradation of microcystin  
422 in Florida's freshwaters. *Biodegradation* 23: 35-45.
- 423 17. Tsuji K, Asakawa M, Anzai Y, Sumino T, Harada K (2006) Degradation of microcystins  
424 using immobilized microorganism isolated in an eutrophic lake. *Chemosphere*. 65: 117-24.
- 425 18. Zhang J, Lu Q, Ding Q, Yin L, Pu Y (2017) A Novel and Native Microcystin-Degrading  
426 Bacterium of *Sphingopyxis* sp. Isolated from Lake Taihu. *International journal of environmental*  
427 *research and public health* 6;14

- 428 19. Tsao S, Wei D-J, Chang Y-T, Lee J-F (2017) Aerobic biodegradation biodegradation of  
429 microcystin-LR by an indigenous bacterial mixed culture isolated in Taiwan. *International*  
430 *Biodeterioration & Biodegradation* 124:101-108.
- 431 20. Tamura K, Dudley J, Nei M, Kumar S (2007) MEGA4: Molecular Evolutionary Genetics  
432 Analysis (MEGA) software version 4.0. *Molecular biology and evolution* 24: 1596-1599.
- 433 21. Bourne DG, Jones GJ, Blakeley RL, Jones A, Negri AP, Riddles P (1996) Enzymatic  
434 pathway for the bacterial degradation of the cyanobacterial cyclic peptide toxin microcystin LR.  
435 *Applied and environmental microbiology* 62: 4086-4094.
- 436 22. Shimizu K, Maseda H, Okano K, Kurashima T, Kawauchi Y, Xue Q, et al. (2012) Enzymatic  
437 pathway for biodegrading microcystin LR in *Sphingopyxis* sp. C-1. *Journal of bioscience and*  
438 *bioengineering* 114: 630-634.
- 439 23. Bourne DG, Riddles P, Jones GJ, Smith W, Blakeley RL (2001) Characterisation of a gene  
440 cluster involved in bacterial degradation of the cyanobacterial toxin microcystin LR. *Environ*  
441 *Toxicol* 16:523-534.
- 442 24. Ho L, Hoefel D, Saint CP, Newcombe G (2007) Isolation and identification of a novel  
443 microcystin-degrading bacterium from a biological sand filter. *Water research* 41: 4685-4695.
- 444 25. Chen J, Hu LB, Zhou W, Yan SH, Yang JD, Xue YF, et al. (2010) Degradation of  
445 microcystin-LR and RR by a *Stenotrophomonas* sp. strain EMS isolated from Lake Taihu, China.  
446 *International journal of molecular sciences* 2: 896-911.
- 447 26. Zhang ML, Yan H, Pan G (2011) Microbial degradation of microcystin-LR by *Ralstonia*  
448 *solanacearum*. *Environmental technology*. 32: 1779-1787.
- 449 27. Cousins IT, Bealing DJ, James HA, Sutton A (1996) Biodegradation of microcystin-LR by  
450 indigenous mixed bacterial populations. *Water research* 30: 481-485.

- 451 28. Alamri SA (2012) Biodegradation of microcystin-RR by *Bacillus flexus* isolated from a  
452 Saudi freshwater lake. *Saudi Journal of Biological Sciences* 19: 435-440.
- 453 29. Park HD, Sasaki Y, Maruyama T, Yanagisawa E, Hiraishi A, Kato K (2001) Degradation of  
454 the cyanobacterial hepatotoxin microcystin by a new bacterium isolated from a hypertrophic  
455 lake. *Environmental Toxicology* 16: 337-343.
- 456 30. Zhang Y, Shao Y, Gao N, Chu W, Sun Z (2016) Removal of microcystin-LR by free  
457 chlorine: Identify of transformation products and disinfection by-products formation. *Chemical*  
458 *Engineering Journal* 287:189-195.
- 459 31. Okano K, Shimizu K, Kawauchi Y, Maseda H, Utsumi M, Zhang Z, et al. (2009)  
460 Characteristics of a Microcystin-Degrading Bacterium under Alkaline Environmental  
461 Conditions. *J Toxicol* 954291
- 462 32. Harada K, Imanishi S, Kato H, Mizuno M, Ito E, Tsuji K (2004) Isolation of Adda from  
463 microcystin-LR by microbial degradation. *Toxicon*. 44: 107-109.

464

465

466

467

468

469

470

471

472

473

474
